# Supplementary material
Source: Elsevier journal article supplement (https://authors.library.caltech.edu/75011/4/mmc3.pdf)

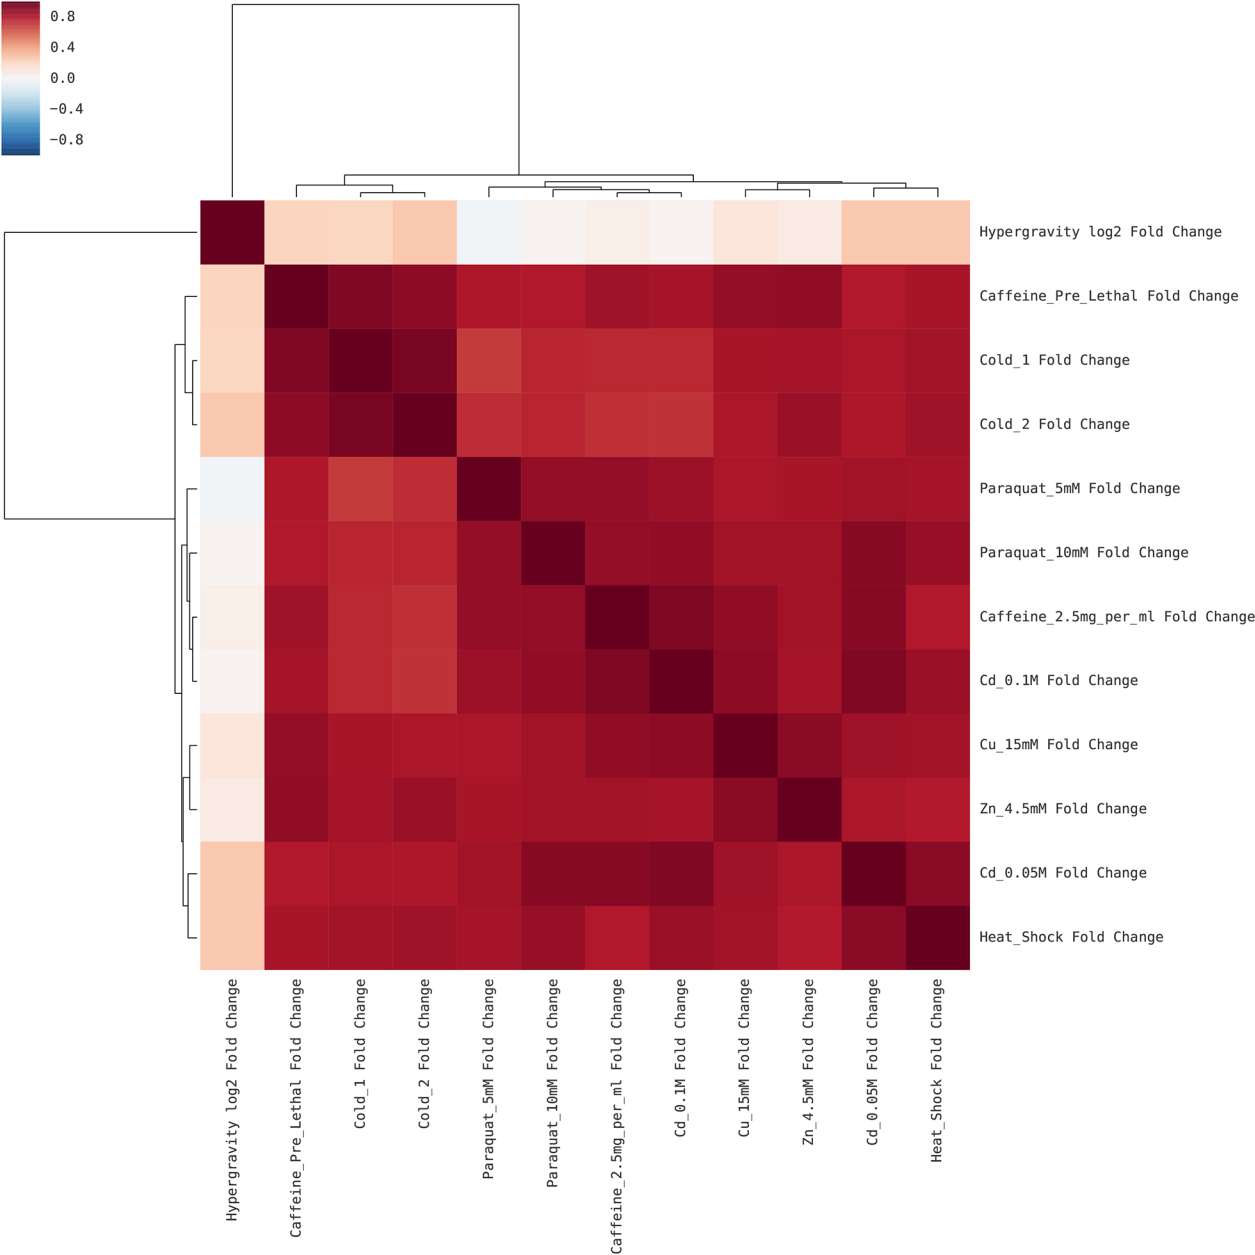

Supplement: mmc3 [file mmc3.pdf]
